# Supplementary material for: ApoC-III ASO promotes tissue LPL activity in the absence of apoE-mediated TRL clearance
Source: PubMed Central journal article supplement (PMC6672034; doi:10.1194/jlr.m093740), 2019-05-14
Supplement: 10.1194_M093740_jlr.M093740-1.pdf [file 10.1194_M093740_jlr.M093740-1.pdf]

## **ApoC-III ASO Promotes Tissue LPL Activity in Absence of ApoE-Mediated TRL Clearance**

**Bastian Ramms<sup>1,2,3,4</sup>, Sohan Patel<sup>2,3</sup>, Chelsea Nora<sup>2</sup>, Ariane R. Pessentheiner<sup>2,3</sup>, Max W. Chang<sup>1</sup>, Courtney R. Green<sup>5</sup>, Gregory J. Golden<sup>1,3</sup>, Patrick Secrest<sup>1</sup>, Ronald M. Krauss<sup>5</sup>, Christian M. Metallo<sup>5</sup>, Christopher Benner<sup>1</sup>, Mark J. Graham<sup>6</sup>, Joseph L. Witztum<sup>2</sup>, Sotirios Tsimikas<sup>2</sup>, Jeffrey D. Esko<sup>1,3</sup> and Philip L.S.M. Gordts<sup>1,2,3\*</sup>**

<sup>1</sup>Department of Cellular and Molecular Medicine, University of California, San Diego, La Jolla, CA, USA.

<sup>2</sup>Department of Medicine, University of California, San Diego, La Jolla, CA, USA.

<sup>3</sup>Glycobiology Research and Training Center, University of California San Diego, La Jolla, CA, USA.

<sup>4</sup>Department of Chemistry, Biochemistry I, Bielefeld University, Bielefeld, Germany.

<sup>5</sup>Department of Bioengineering, University of California, San Diego, La Jolla, CA, USA.

<sup>6</sup>Children's Hospital Oakland Research Institute, Oakland, CA, USA.

<sup>7</sup>Ionis Pharmaceuticals Inc., Carlsbad, CA, USA.

### **\*Corresponding author**

Philip L.S.M. Gordts, Department of Medicine, University of California, San Diego, La Jolla, CA 92093-0687, Ph: 858/246-0994, FAX: 858/534-5611, pgordts@ucsd.edu

**Running Title:** ApoE determines the metabolic impact of apoC-III

**SUPPLEMENTARY TABLES AND FIGURES.**

**SUPPLEMENTAL TABLES**

**Supplemental Table S1: Murine Antisense Oligonucleotide Sequences.**

| <b>Ionis ID</b> | <b>Name</b>  | <b>Target Gene</b> | <b>Sequence</b>            |
|-----------------|--------------|--------------------|----------------------------|
| ION 440726      | ApoC-III ASO | apoC-III           | 5'-CCAGCTTTATTAGGGACAGC-3' |
| ION 141923      | Control ASO  | N.A. (scramble)    | 5'-CCTTCCCTGAAGGTCCTCC-3'  |

**Supplemental Table S2: Real-Time PCR Primers.**

| <b>Gene</b>  | <b>Forward Primer</b>           | <b>Reverse Primer</b>       |
|--------------|---------------------------------|-----------------------------|
| <i>Apoc3</i> | 5'-TGCAGGGCTACATGGAACAA-3'      | 5'-TCGGACTCCTGCACGCTACTT-3' |
| <i>Tbp</i>   | 5'-GAAGCTGCGGTACAATTCCAG-<br>3' | 5'-CCCCTTGTACCCTTCACCAAT-3' |

**Supplemental Table S3: Lipid analysis of a homozygote apoE cohort administered with placebo or volanesorsen (Ionis 304801) as a monotherapy.**

| ApoE isoform                      | Treatment                         |                    | Parameter           |                |                  |                      |              |
|-----------------------------------|-----------------------------------|--------------------|---------------------|----------------|------------------|----------------------|--------------|
|                                   |                                   |                    | ApoC-III<br>(mg/dL) | TGs<br>(mg/dL) | HDL-C<br>(mg/dL) | non-HDL-C<br>(mg/dL) |              |
| E2/E2                             | Placebo<br>(n = 1)                | Pre                | 11.0                | 190.0          | 41.0             | 101.0                |              |
|                                   |                                   | Post               | 13.8                | 244.0          | 39.0             | 124.0                |              |
|                                   |                                   | Change             | 26.0%               | 28.4%          | -4.9%            | 22.8%                |              |
|                                   | Volanesorsen<br>300 mg<br>(n = 2) | Pre                | 22.6 ± 4.1          | 687 ± 374.8    | 40 ± 17.0        | 245 ± 94.8           |              |
|                                   |                                   | Post               | 3.4 ± 0.9           | 118.5 ± 1.4    | 68.8 ± 29.3      | 78.5 ± 14.9          |              |
|                                   |                                   | Change             | -85.3 ± 1.5%        | -79.8 ± 10.8%  | 71.8 ± 0.5%      | -66.6 ± 6.8%         |              |
|                                   | E3/E3                             | Placebo<br>(n = 6) | Pre                 | 20.2 ± 6.9     | 408.8 ± 153.8    | 33.5 ± 6.2           | 219.5 ± 58.7 |
|                                   |                                   |                    | Post                | 18.8 ± 5.6     | 396.7 ± 148      | 36.4 ± 9.5           | 201.7 ± 20.3 |
|                                   |                                   |                    | Change              | -2.3 ± 29.0%   | 1.1 ± 27.6%      | 8.3 ± 18.7%          | -5.1 ± 15.8% |
| Volanesorsen<br>100 mg<br>(n = 3) |                                   | Pre                | 27.6 ± 0.9          | 936.2 ± 109.8  | 26.0 ± 2.0       | 258.0 ± 19.7         |              |
|                                   |                                   | Post               | 9.9 ± 4.7           | 249.5 ± 118.5  | 41.3 ± 15.5      | 211.8 ± 14.7         |              |
|                                   |                                   | Change             | -64.6 ± 16.2%       | -72.8 ± 14.3%  | 60.0 ± 61.1%     | -17.6 ± 8.2%         |              |
| Volanesorsen<br>200 mg<br>(n = 3) |                                   | Pre                | 23.0 ± 2.2          | 599.2 ± 224.2  | 30.7 ± 5.8       | 170.7 ± 62.7         |              |
|                                   |                                   | Post               | 7.4 ± 0.4           | 202.2 ± 60.8   | 41.8 ± 6.8       | 158.2 ± 28.1         |              |
|                                   |                                   | Change             | -67.4 ± 4.6%        | -63.0 ± 18.5%  | 37.9 ± 19.1%     | -3.5 ± 15.7%         |              |
| E4/E4                             | Placebo<br>(n = 0)                | Pre                | -                   | -              | -                | -                    |              |
|                                   |                                   | Post               | -                   | -              | -                | -                    |              |
|                                   |                                   | Change             | -                   | -              | -                | -                    |              |
|                                   | Volanesorsen<br>300 mg<br>(n = 3) | Pre                | 20.4 ± 2.6          | 462.5 ± 129.5  | 30.7 ± 1.2       | 195.7 ± 11.0         |              |
|                                   |                                   | Post               | 4.3 ± 1.6           | 113 ± 7.7      | 45 ± 1.7         | 178.8 ± 36.8         |              |
|                                   |                                   | Change             | -78.1 ± 10.3%       | -74.1 ± 7.8%   | 47 ± 10.9%       | -8.7 ± 17.7%         |              |

Values represent mean ± SD.

**Supplemental Table S4: Lipid analysis of a homozygote apoE cohort administered with placebo or volanesorsen (Ionis 304801) as an add-on to fibrates.**

| ApoE isoform | Treatment                                      |        | Parameter           |                |                  |                      |
|--------------|------------------------------------------------|--------|---------------------|----------------|------------------|----------------------|
|              |                                                |        | ApoC-III<br>(mg/dL) | TGs<br>(mg/dL) | HDL-C<br>(mg/dL) | non-HDL-C<br>(mg/dL) |
| E2/E2        | Fibrate +<br>Placebo<br>(n = 3)                | Pre    | 18.6 ± 5.4          | 482.7 ± 222.9  | 36.7 ± 13.3      | 173.7 ± 65.5         |
|              |                                                | Post   | 18.5 ± 5.5          | 412.2 ± 211.8  | 42.3 ± 11.9      | 159.2 ± 50.0         |
|              |                                                | Change | 0.8 ± 19.0%         | -10.6 ± 28.9%  | 19.0 ± 29.8%     | -5.4 ± 15.4%         |
|              | Fibrate +<br>Volanesorsen<br>300 mg<br>(n = 1) | Pre    | 11.6                | 241.0          | 47.0             | 178.0                |
|              |                                                | Post   | 3.0                 | 91.0           | 63.5             | 75.0                 |
|              |                                                | Change | -74.3%              | -62.2%         | 35.1%            | -57.9%               |
| E3/E3        | Fibrate +<br>Placebo<br>(n = 1)                | Pre    | 10.3                | 204.0          | 37.0             | 178.0                |
|              |                                                | Post   | 15.3                | 314.0          | 30.0             | 179.0                |
|              |                                                | Change | 48.4%               | 53.9%          | -18.9%           | 0.6%                 |
|              | Fibrate +<br>Volanesorsen<br>200 mg<br>(n = 4) | Pre    | 13.5 ± 1.0          | 262.1 ± 40.0   | 34.8 ± 3.8       | 188.0 ± 33.8         |
|              |                                                | Post   | 4.9 ± 1.9           | 126.5 ± 30.9   | 50.5 ± 10.1      | 145.4 ± 22.3         |
|              |                                                | Change | -63.8 ± 13.6%       | -51.3 ± 11.3%  | 44.8 ± 21.0%     | -21.8 ± 10.4%        |
|              | Fibrate +<br>Volanesorsen<br>300 mg<br>(n = 3) | Pre    | 15.7 ± 1.8          | 255.2 ± 17.1   | 39.7 ± 14.6      | 165.3 ± 47.0         |
|              |                                                | Post   | 5.5 ± 2.3           | 98.0 ± 30.4    | 61.2 ± 29.3      | 134.5 ± 19.0         |
|              |                                                | Change | -64.0 ± 16.5%       | -61.0 ± 14.0%  | 51.1 ± 44.9%     | -15.5 ± 18.0%        |
| E4/E4        | Fibrate +<br>Placebo<br>(n = 1)                | Pre    | 25.5                | 495.0          | 30.0             | 316.0                |
|              |                                                | Post   | 21.4                | 408.0          | 31.0             | 281.0                |
|              |                                                | Change | -16.2%              | -17.6%         | 3.3%             | -11.1%               |
|              | Fibrate +<br>Volanesorsen<br>300 mg<br>(n = 1) | Pre    | 29.6                | 932.0          | 14.0             | 235.0                |
|              |                                                | Post   | 5.9                 | 249.5          | 21.5             | 183.0                |
|              |                                                | Change | -80.1%              | -73.2%         | 53.6%            | -22.1%               |

Values represent mean ± SD.

**Supplemental Table S5: Combined data of lipid analysis of a heterozygote apoE cohort administered with placebo or volanesorsen (Ionis 304801) as a monotherapy or add on to fibrates.**

| ApoE isoform | Treatment                   |        | Parameter        |               |               |                   |
|--------------|-----------------------------|--------|------------------|---------------|---------------|-------------------|
|              |                             |        | ApoC-III (mg/dL) | TGs (mg/dL)   | HDL-C (mg/dL) | non-HDL-C (mg/dL) |
| E2/E3        | Placebo (n = 5)             | Pre    | 25.2 ± 10.7      | 760.2 ± 624.4 | 30.4 ± 10.9   | 241.2 ± 112.3     |
|              |                             | Post   | 16.7 ± 4.4       | 489.0 ± 361.5 | 30.9 ± 10.5   | 182.6 ± 46.0      |
|              |                             | Change | -23.4 ± 39.1%    | -10.5 ± 78.5% | 2.3 ± 10.7%   | -15.2 ± 36.2%     |
|              | Volanesorsen 100 mg (n = 2) | Pre    | 12.0 ± 3.6       | 420.0 ± 174.0 | 37.0 ± 1.4    | 130.5 ± 55.9      |
|              |                             | Post   | 9.4 ± 3.1        | 390.8 ± 161.6 | 35.8 ± 10.3   | 125.0 ± 20.5      |
|              |                             | Change | -21.6 ± 2.0%     | -7.0 ± 0.1%   | -3.8 ± 24.0%  | 1.7 ± 27.8%       |
|              | Volanesorsen 200 mg (n = 2) | Pre    | 21.3 ± 12.0      | 594.0 ± 418.6 | 31.0 ± 4.2    | 199.5 ± 26.2      |
|              |                             | Post   | 5.8 ± 0.1        | 166.5 ± 2.1   | 43.0 ± 0.7    | 200.5 ± 33.9      |
|              |                             | Change | -67.5 ± 17.9%    | -62.9 ± 25.8% | 39.9 ± 16.9%  | 2.5 ± 30.5%       |
|              | Volanesorsen 300 mg (n = 3) | Pre    | 25.0 ± 5.8       | 491.3 ± 71.2  | 36.0 ± 2.0    | 204.7 ± 33.7      |
|              |                             | Post   | 6.5 ± 2.9        | 164.8 ± 31.2  | 55.5 ± 3.5    | 123.3 ± 55.4      |
|              |                             | Change | -74.8 ± 7.3%     | -65.7 ± 9.9%  | 54.3 ± 9.0%   | -40.9 ± 19.7%     |
| E2/E4        | Placebo (n = 0)             | Pre    | -                | -             | -             | -                 |
|              |                             | Post   | -                | -             | -             | -                 |
|              |                             | Change | -                | -             | -             | -                 |
|              | Volanesorsen 200 mg (n = 2) | Pre    | 24.0 ± 2.8       | 715.8 ± 1.8   | 35.0 ± 4.2    | 178.0 ± 2.8       |
|              |                             | Post   | 10.5 ± 10.3      | 424.5 ± 419.3 | 37.8 ± 12.4   | 176.5 ± 13.4      |
|              |                             | Change | -53.3 ± 48.6%    | -40.6 ± 58.7% | 10.8 ± 48.8%  | -0.8 ± 9.1%       |
| E3/E4        | Placebo (n = 7)             | Pre    | 22.4 ± 2.8       | 489.6 ± 83.6  | 33.7 ± 5.4    | 176.7 ± 50.0      |
|              |                             | Post   | 27.0 ± 13.7      | 671.3 ± 417.9 | 31.6 ± 5.1    | 188.6 ± 48.5      |
|              |                             | Change | 17.2 ± 44.1%     | 39.0 ± 88.4%  | -5.7 ± 11.5%  | 15.1 ± 53.3%      |
|              | Volanesorsen 100 mg (n = 6) | Pre    | 23.2 ± 7.3       | 474.8 ± 158.8 | 31.7 ± 2.0    | 201.3 ± 30.3      |
|              |                             | Post   | 14.0 ± 5.8       | 316.3 ± 158.0 | 38.1 ± 5.7    | 193.0 ± 52.4      |
|              |                             | Change | -33.9 ± 37.3%    | -18.6 ± 70.1% | 20.0 ± 13.7%  | -4.9 ± 20.4%      |
|              | Volanesorsen 200 mg (n = 8) | Pre    | 20.8 ± 6.4       | 533.4 ± 375.4 | 32.1 ± 5.4    | 194.6 ± 72.5      |
|              |                             | Post   | 7.4 ± 3.5        | 188.6 ± 83.3  | 49.1 ± 18.8   | 163.1 ± 47.1      |
|              |                             | Change | -61.0 ± 20.2%    | -56.1 ± 24.3% | 49.3 ± 32.4%  | -11.7 ± 21.1%     |
|              | Volanesorsen                | Pre    | 21.3 ± 7.4       | 520.7 ± 249.6 | 30.6 ± 10.8   | 147.6 ± 51.2      |

|                           |                        |                            |                               |                            |                              |
|---------------------------|------------------------|----------------------------|-------------------------------|----------------------------|------------------------------|
| <b>300 mg<br/>(n = 7)</b> | <b>Post<br/>Change</b> | 4.6 ± 2.0<br>-75.4 ± 14.6% | 155.8 ± 46.3<br>-64.5 ± 15.5% | 41.3 ± 9.3<br>42.2 ± 28.0% | 168.2 ± 75.9<br>11.6 ± 29.3% |
|---------------------------|------------------------|----------------------------|-------------------------------|----------------------------|------------------------------|

---

Values represent mean ± SD.

**Supplemental Table S6: Lipid analysis of a heterozygote apoE cohort administered with placebo or volanesorsen (Ionis 304801) as a monotherapy.**

| ApoE isoform | Treatment                         |        | Parameter           |                |                  |                      |
|--------------|-----------------------------------|--------|---------------------|----------------|------------------|----------------------|
|              |                                   |        | ApoC-III<br>(mg/dL) | TGs<br>(mg/dL) | HDL-C<br>(mg/dL) | non-HDL-C<br>(mg/dL) |
| E2/E3        | Placebo<br>(n = 3)                | Pre    | 29.6 ± 12.2         | 915.7 ± 786.0  | 28.7 ± 13.3      | 268.7 ± 147.7        |
|              |                                   | Post   | 17.8 ± 5.8          | 603.5 ± 458.4  | 28.2 ± 13.3      | 211.5 ± 12.1         |
|              |                                   | Change | -27.0 ± 53.7%       | -1.0 ± 105.5%  | -1.7 ± 7.1%      | -4.6 ± 46.3%         |
|              | Volanesorsen<br>100 mg<br>(n = 2) | Pre    | 12.0 ± 3.6          | 420.0 ± 174.0  | 37.0 ± 1.4       | 130.5 ± 55.9         |
|              |                                   | Post   | 9.4 ± 3.1           | 390.8 ± 161.6  | 35.8 ± 10.3      | 125.0 ± 20.5         |
|              |                                   | Change | -21.6 ± 2.0%        | -7.0 ± 0.1%    | -3.8 ± 24.0%     | 1.7 ± 27.8%          |
|              | Volanesorsen<br>200 mg<br>(n = 2) | Pre    | 21.3 ± 12.0         | 594.0 ± 418.6  | 31.0 ± 4.2       | 199.5 ± 26.2         |
|              |                                   | Post   | 5.8 ± 0.1           | 166.5 ± 2.1    | 43.0 ± 0.7       | 200.5 ± 33.9         |
|              |                                   | Change | -67.2 ± 17.9%       | -62.9 ± 25.8%  | 39.9 ± 16.9%     | 2.5 ± 30.5%          |
|              | Volanesorsen<br>300 mg<br>(n = 1) | Pre    | 30.3                | 573.0          | 38.0             | 180.0                |
|              |                                   | Post   | 8.6                 | 151.5          | 55.5             | 118.5                |
|              |                                   | Change | -71.6%              | -73.6%         | 46.1%            | -34.2%               |
| E2/E4        | Placebo<br>(n = 0)                | Pre    | -                   | -              | -                | -                    |
|              |                                   | Post   | -                   | -              | -                | -                    |
|              |                                   | Change | -                   | -              | -                | -                    |
|              | Volanesorsen<br>200 mg<br>(n = 2) | Pre    | 24.0 ± 2.8          | 715.8 ± 1.8    | 35.0 ± 4.2       | 178.0 ± 2.8          |
|              |                                   | Post   | 10.5 ± 10.3         | 424.5 ± 419.3  | 37.8 ± 12.4      | 176.5 ± 13.4         |
|              |                                   | Change | -53.3 ± 48.6%       | -40.6 ± 58.7%  | 10.8 ± 48.8%     | -0.8 ± 9.1%          |
| E3/E4        | Placebo<br>(n = 6)                | Pre    | 22.2 ± 3.0          | 495.4 ± 90.0   | 33.3 ± 5.8       | 184.3 ± 50.1         |
|              |                                   | Post   | 28.3 ± 14.5         | 719.8 ± 435.7  | 31.5 ± 5.6       | 201.6 ± 37.4         |
|              |                                   | Change | 22.7 ± 45.5%        | 48.2 ± 93.0%   | -4.8 ± 12.3%     | 20.2 ± 56.5%         |
|              | Volanesorsen<br>100 mg<br>(n = 6) | Pre    | 23.2 ± 7.3          | 474.8 ± 158.8  | 31.7 ± 2.0       | 201.3 ± 30.3         |
|              |                                   | Post   | 14.0 ± 5.8          | 316.3 ± 158.0  | 38.1 ± 5.7       | 193.0 ± 52.4         |
|              |                                   | Change | -33.9 ± 37.3%       | -18.6 ± 70.1%  | 20.0 ± 13.7%     | -4.9 ± 20.5%         |
|              | Volanesorsen<br>200 mg<br>(n = 5) | Pre    | 23.1 ± 6.4          | 667.0 ± 423.8  | 31.6 ± 3.0       | 227.8 ± 69.3         |
|              |                                   | Post   | 7.3 ± 3.8           | 205.5 ± 71.3   | 45.6 ± 10.2      | 186.9 ± 42.0         |
|              |                                   | Change | -64.4 ± 24.7%       | -59.3 ± 28.6%  | 43.9 ± 24.6%     | -14.9 ± 16.3%        |
|              | Volanesorsen<br>300 mg            | Pre    | 22.4 ± 8.5          | 563.2 ± 259.6  | 32.0 ± 11.1      | 134.2 ± 44.8         |
|              |                                   | Post   | 4.0 ± 1.8           | 161.3 ± 43.7   | 40.6 ± 7.0       | 154.7 ± 62.0         |



**(n = 5)**      **Change**     $-79.9 \pm 11.4\%$      $-65.0 \pm 18.6\%$      $34.3 \pm 29.7\%$      $13.9 \pm 32.2\%$

---

Values represent mean  $\pm$  SD.

**Supplemental Table S7: Lipid analysis of a heterozygote apoE cohort administered with placebo or volanesorsen (Ionis 304801) as add on to fibrates.**

| ApoE isoform | Treatment                                      |        | Parameter           |                |                  |                      |
|--------------|------------------------------------------------|--------|---------------------|----------------|------------------|----------------------|
|              |                                                |        | ApoC-III<br>(mg/dL) | TGs<br>(mg/dL) | HDL-C<br>(mg/dL) | non-HDL-C<br>(mg/dL) |
| E2/E3        | Fibrate +<br>Placebo<br>(n = 2)                | Pre    | 18.6 ± 3.4          | 527.0 ± 377.6  | 33.0 ± 9.9       | 200.0 ± 33.9         |
|              |                                                | Post   | 15.0 ± 0.1          | 317.3 ± 64.0   | 35.0 ± 5.7       | 139.3 ± 43.5         |
|              |                                                | Change | -17.8 ± 15.7%       | -24.9 ± 41.7%  | 8.4 ± 15.4%      | -31.2 ± 10.1%        |
|              | Fibrate +<br>Volanesorsen<br>300 mg<br>(n = 2) | Pre    | 22.3 ± 5.0          | 450.5 ± 12.0   | 35.0 ± 1.4       | 217.0 ± 36.8         |
|              |                                                | Post   | 5.5 ± 3.3           | 171.5 ± 41.0   | 55.5 ± 5.0       | 125.8 ± 78.1         |
|              |                                                | Change | -76.5 ± 9.5%        | -61.8 ± 10.1%  | 58.4 ± 7.7%      | -44.3 ± 26.6%        |
| E2/E4        | Fibrate +<br>Placebo<br>(n = 0)                | Pre    | -                   | -              | -                | -                    |
|              |                                                | Post   | -                   | -              | -                | -                    |
|              |                                                | Change | -                   | -              | -                | -                    |
|              | Fibrate +<br>Volanesorsen<br>(n = 0)           | Pre    | -                   | -              | -                | -                    |
|              |                                                | Post   | -                   | -              | -                | -                    |
|              |                                                | Change | -                   | -              | -                | -                    |
| E3/E4        | Fibrate +<br>Placebo<br>(n = 1)                | Pre    | 23.4                | 455.0          | 36.0             | 131.0                |
|              |                                                | Post   | 19.6                | 380.5          | 32.0             | 110.5                |
|              |                                                | Change | -16.2%              | -16.4%         | -11.1%           | -15.6%               |
|              | Fibrate +<br>Volanesorsen<br>200 mg<br>(n = 3) | Pre    | 16.9 ± 5.2          | 310.7 ± 122.3  | 33.0 ± 9.0       | 139.3 ± 37.8         |
|              |                                                | Post   | 7.7 ± 3.7           | 160.5 ± 110.5  | 54.8 ± 30.8      | 123.3 ± 22.5         |
|              |                                                | Change | -55.3 ± 11.5%       | -50.7 ± 18.8%  | 58.3 ± 47.6%     | -6.4 ± 31.0%         |
|              | Fibrate +<br>Volanesorsen<br>300 mg<br>(n = 2) | Pre    | 18.5 ± 4.5          | 414.5 ± 269.4  | 27.0 ± 12.7      | 181.0 ± 67.9         |
|              |                                                | Post   | 6.2 ± 2.1           | 142.0 ± 68.6   | 43.0 ± 17.7      | 202.0 ± 126.6        |
|              |                                                | Change | -64.2 ± 20.0%       | -63.4 ± 7.3%   | 61.8 ± 10.8%     | 5.9 ± 30.2%          |

Values represent mean ± SD.

**Supplemental Figures:**

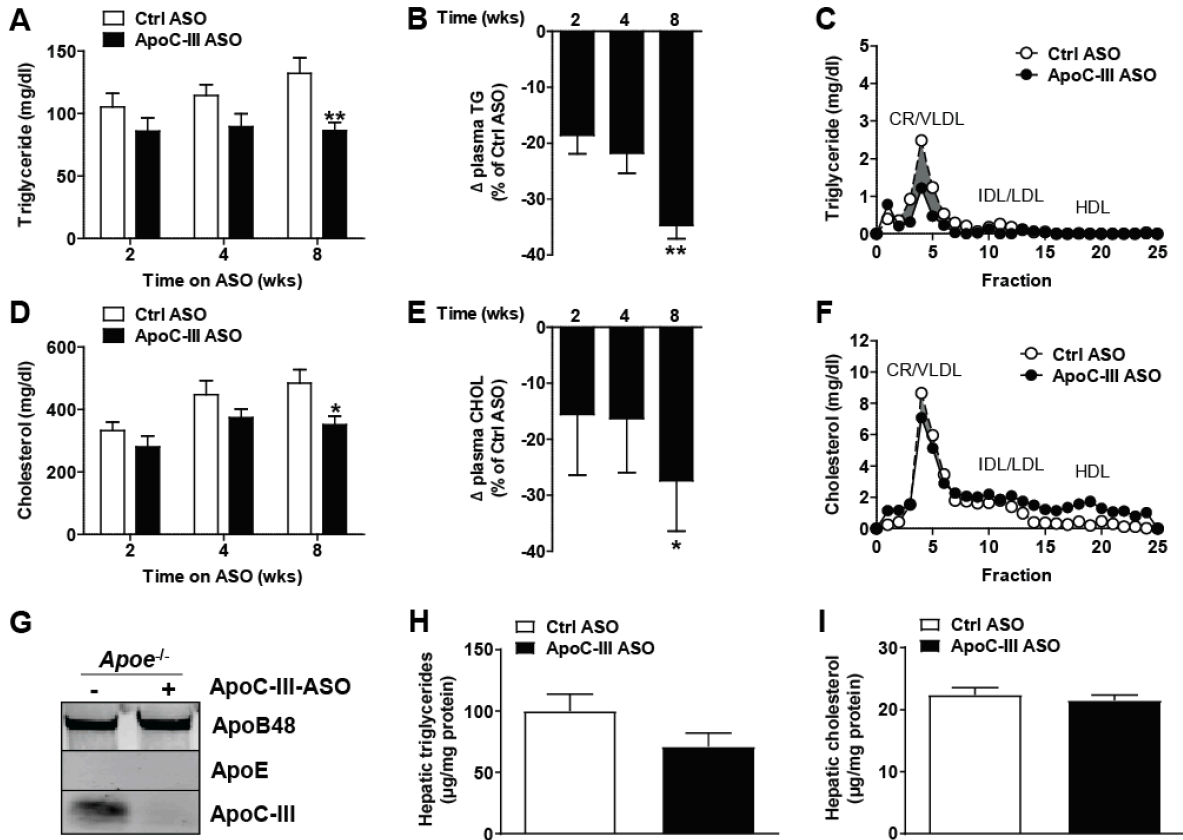

**Supplemental Figure S1. Targeting *apoC-III* with ASOs in chow-fed *Apoe*<sup>-/-</sup> mice.** (A) *Apoe*<sup>-/-</sup> mice were administered once weekly with apoC-III ASO or control ASO (50 mg/kg bodyweight) for a period of 8 weeks. Fasting plasma TG levels were measured at the indicated time points. (B) ApoC-III ASO mediated relative change of plasma TG levels compared with control ASO. (C) Pooled plasma samples after 4 weeks of ASO treatment were analyzed by size-exclusion FPLC and TGs in each fraction were measured. (D) Fasting plasma cholesterol levels after apoC-III ASO treatment and (E) relative change in cholesterol compared to control ASO. (F) FPLC analysis of pooled plasma samples 4 weeks of ASO treatment followed by cholesterol determination in each fraction. (G) VLDLs were isolated by ultracentrifugation and pooled VLDL samples (5 μg protein/lane) were analyzed by Western blotting with antibodies against apoB, apoC-III and apoE. Hepatic TG (H) and cholesterol (I) levels were measured (n = 8-10/group, values represent mean ± SEM, \*p<0.05, \*\*p<0.01).

**A**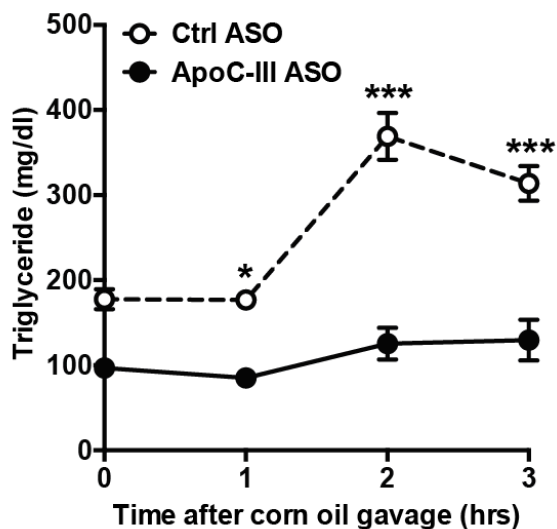**B**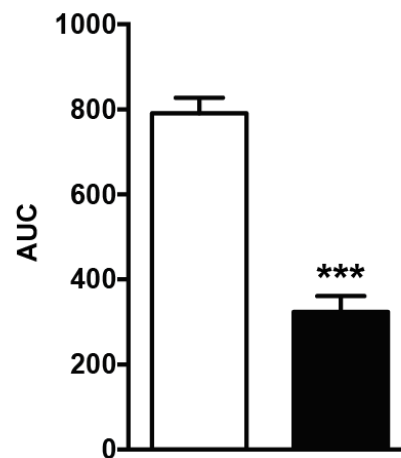

**Supplemental Figure S2. Fat Tolerance Test in Western Diet Fed *ApoE*<sup>-/-</sup>*Ndst1*<sup>fl/fl</sup>*Alb-Cre*<sup>+</sup> mice. (A-B)** ApoC-III ASO or control ASO (50 mg/kg bodyweight) were administered to *ApoE*<sup>-/-</sup>*Ndst1*<sup>fl/fl</sup>*Alb-Cre*<sup>+</sup> mice fed a Western-type diet for 8 weeks and *ApoE*<sup>-/-</sup>*Ndst1*<sup>fl/fl</sup>*Alb-Cre*<sup>+</sup> mice. Fasted mice (5h) were given a 250  $\mu$ L bolus of corn oil by oral gavage to measure fat tolerance. Postprandial TG levels were measured 0, 1, 2, and 3 hours after gavage (n = 4/group).

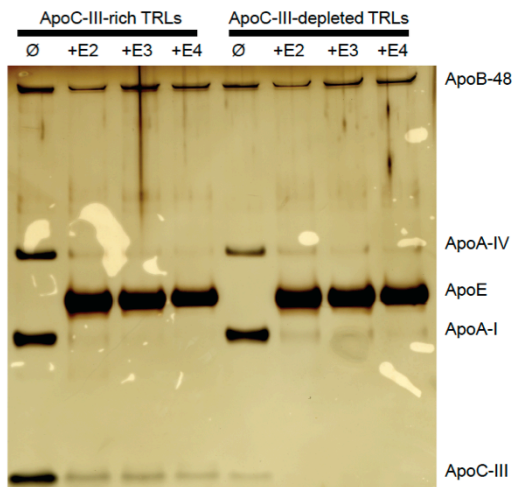

**Supplemental Figure S3: ApoE isoform reconstitution of murine apoE-deficient TRLs.** Silver stained gel of [<sup>3</sup>H]TRLs reconstituted with either apoE2, E3 or E4 (apoE to [<sup>3</sup>H]TRL ratio 1:2).

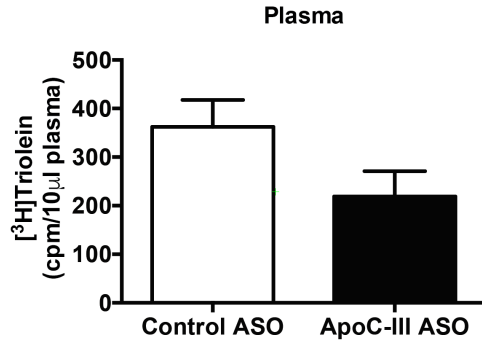

**Supplemental Figure S4. ApoC-III lowering decreased [<sup>3</sup>H]triolein labeled liposyn particles in *ApoE*<sup>-/-</sup>*Ndst1*<sup>ff</sup>*Alb-Cre*<sup>+</sup> mice.** *ApoE*<sup>-/-</sup>*Ndst1*<sup>ff</sup>*Alb-Cre*<sup>+</sup> mice were fasted for 5 h. After a 5 min intravenous injection of [<sup>3</sup>H]triolein labeled liposyn particles (100 µl) blood was collected. [<sup>3</sup>H]triolein plasma concentrations were determined by liquid scintillation counting (n = 4-6).
